# Supplementary material for: The evolution of pelvic limb muscle moment arms in bird-line archosaurs
Source: PubMed Central journal article supplement (PMC7978429; doi:10.1126/sciadv.abe2778), 2021-03-19
Supplement: abe2778_SM.pdf [file abe2778_SM.pdf]

## Supplementary Materials for

### **The evolution of pelvic limb muscle moment arms in bird-line archosaurs**

V. R. Allen, B. M. Kilbourne, J. R. Hutchinson\*

\*Corresponding author. Email: [jhutchinson@rvc.ac.uk](mailto:jhutchinson@rvc.ac.uk)

Published 19 March 2021, *Sci. Adv.* **7**, eabe2778 (2021)  
DOI: [10.1126/sciadv.abe2778](https://doi.org/10.1126/sciadv.abe2778)

#### **The PDF file includes:**

Figs. S1 and S2  
Text S1  
Legends for data files S1 to S7

#### **Other Supplementary Material for this manuscript includes the following:**

(available at [advances.sciencemag.org/cgi/content/full/7/12/eabe2778/DC1](https://advances.sciencemag.org/cgi/content/full/7/12/eabe2778/DC1))

Data files S1 to S7

Supplementary Figures S1 and S2

**Figure S1.** Full-page images of all 13 musculoskeletal models used in this study (also in Figures 1, 2). Right hindlimbs in lateral view. Red lines are MTUs; blue points are “via points”; bones underlie these.

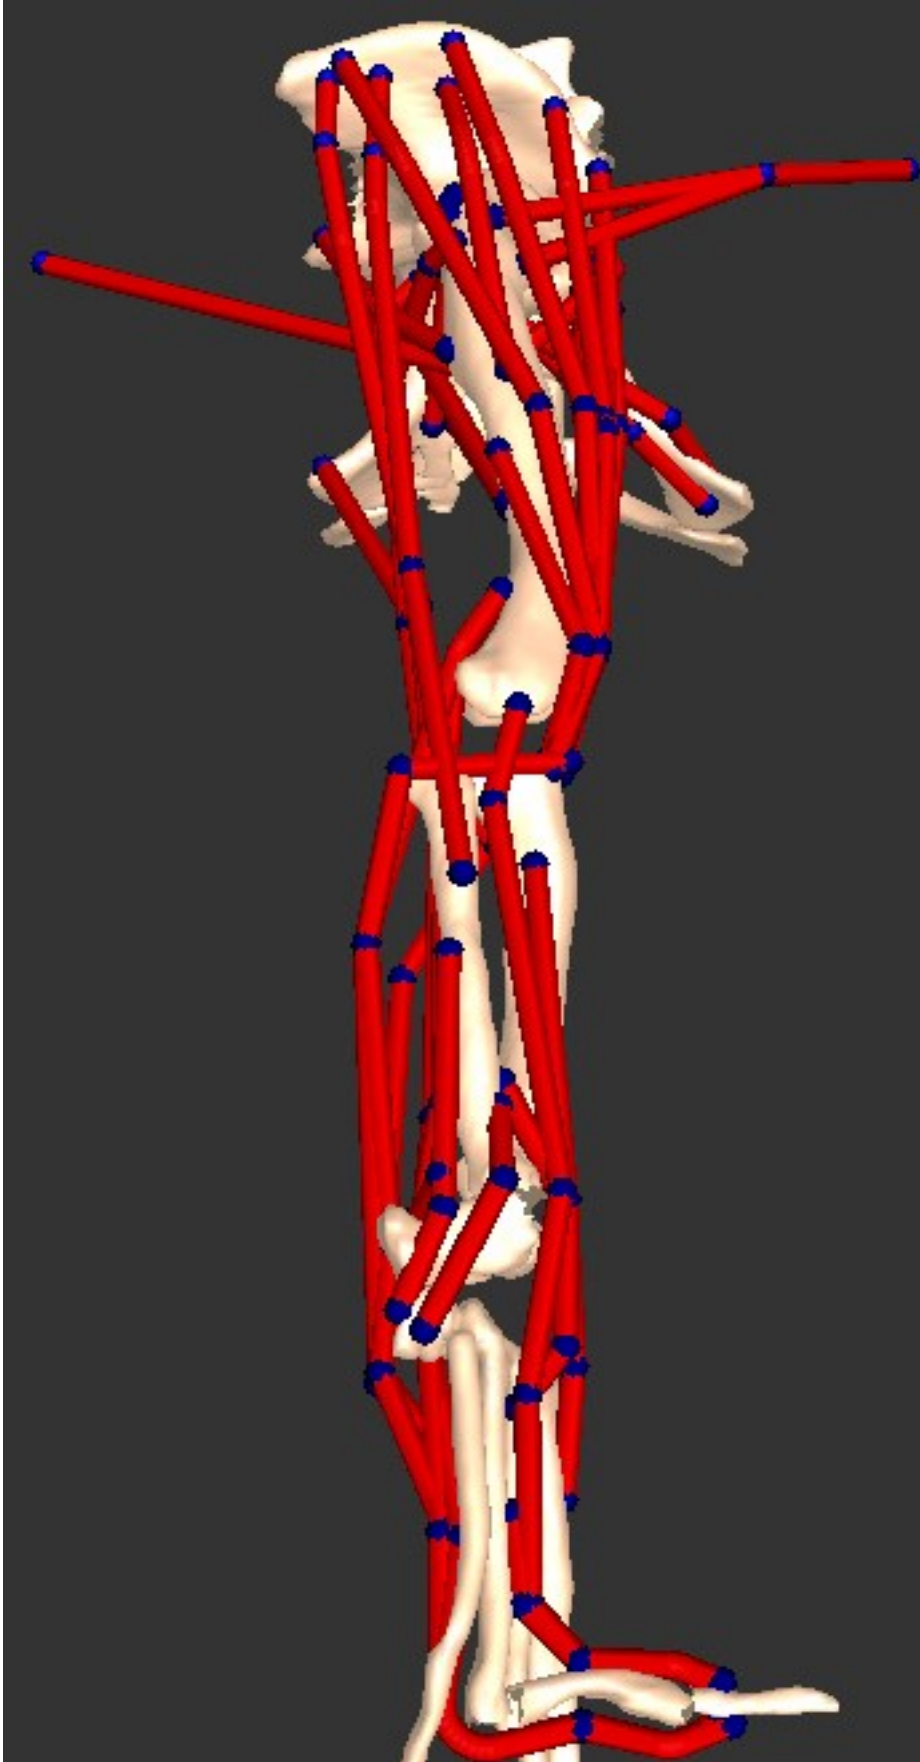

*Crocodylus*

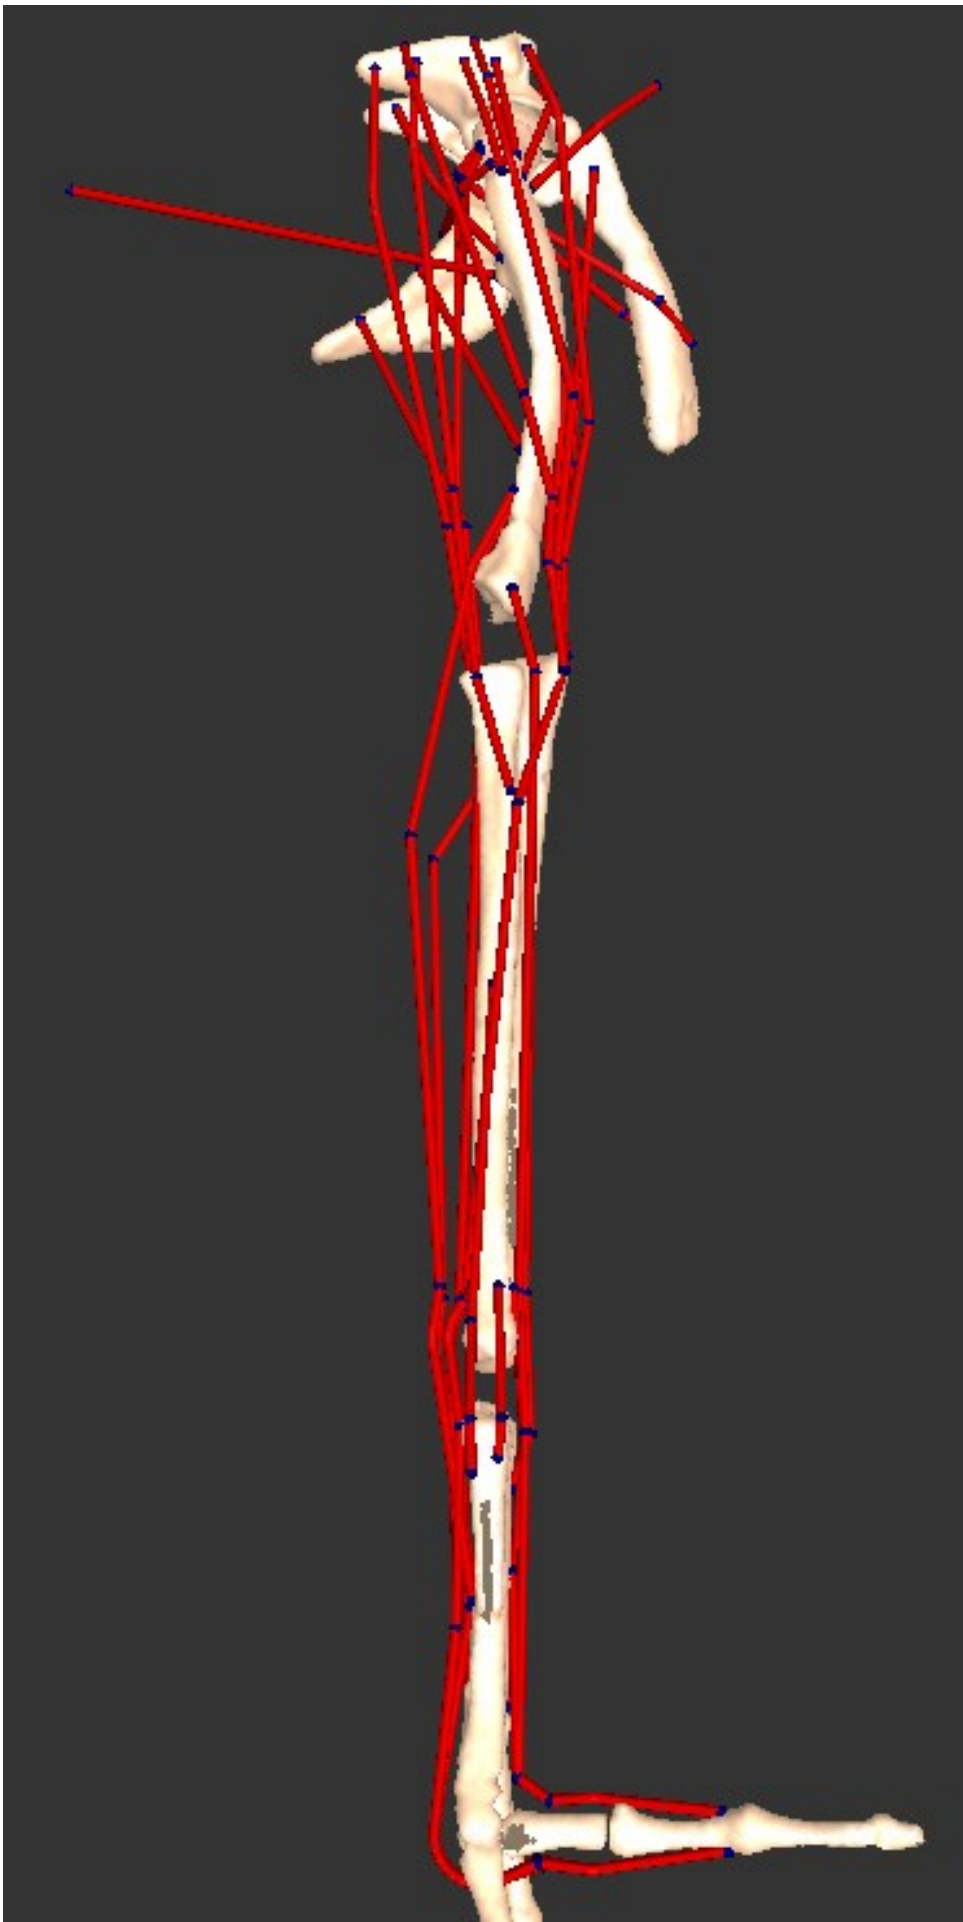

*Marasuchus*

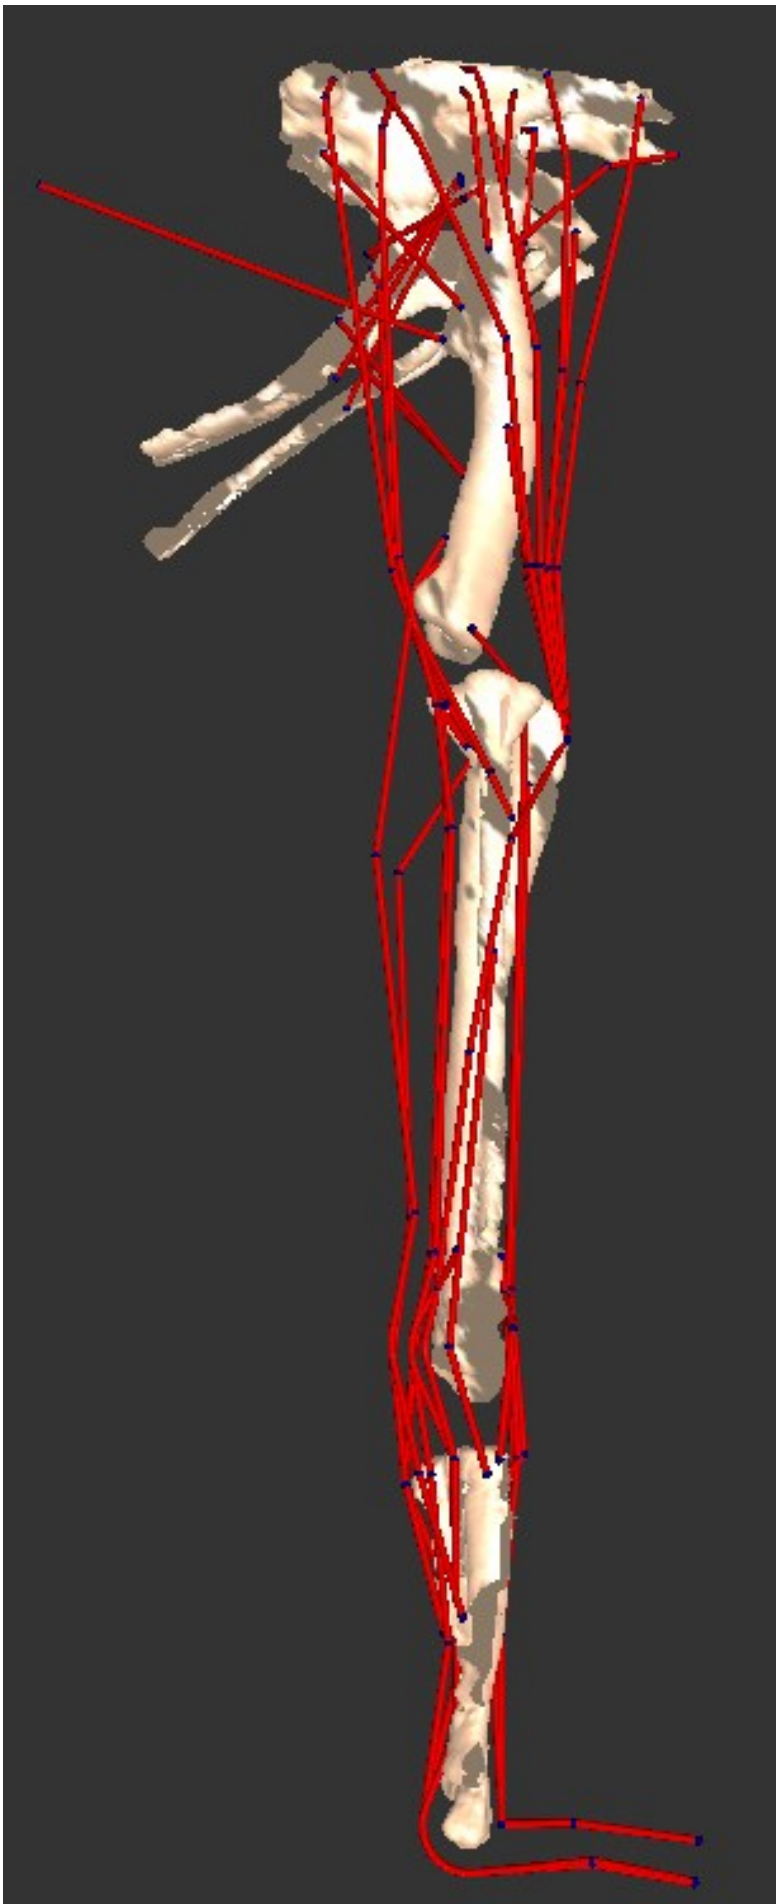

*Lesothosaurus*

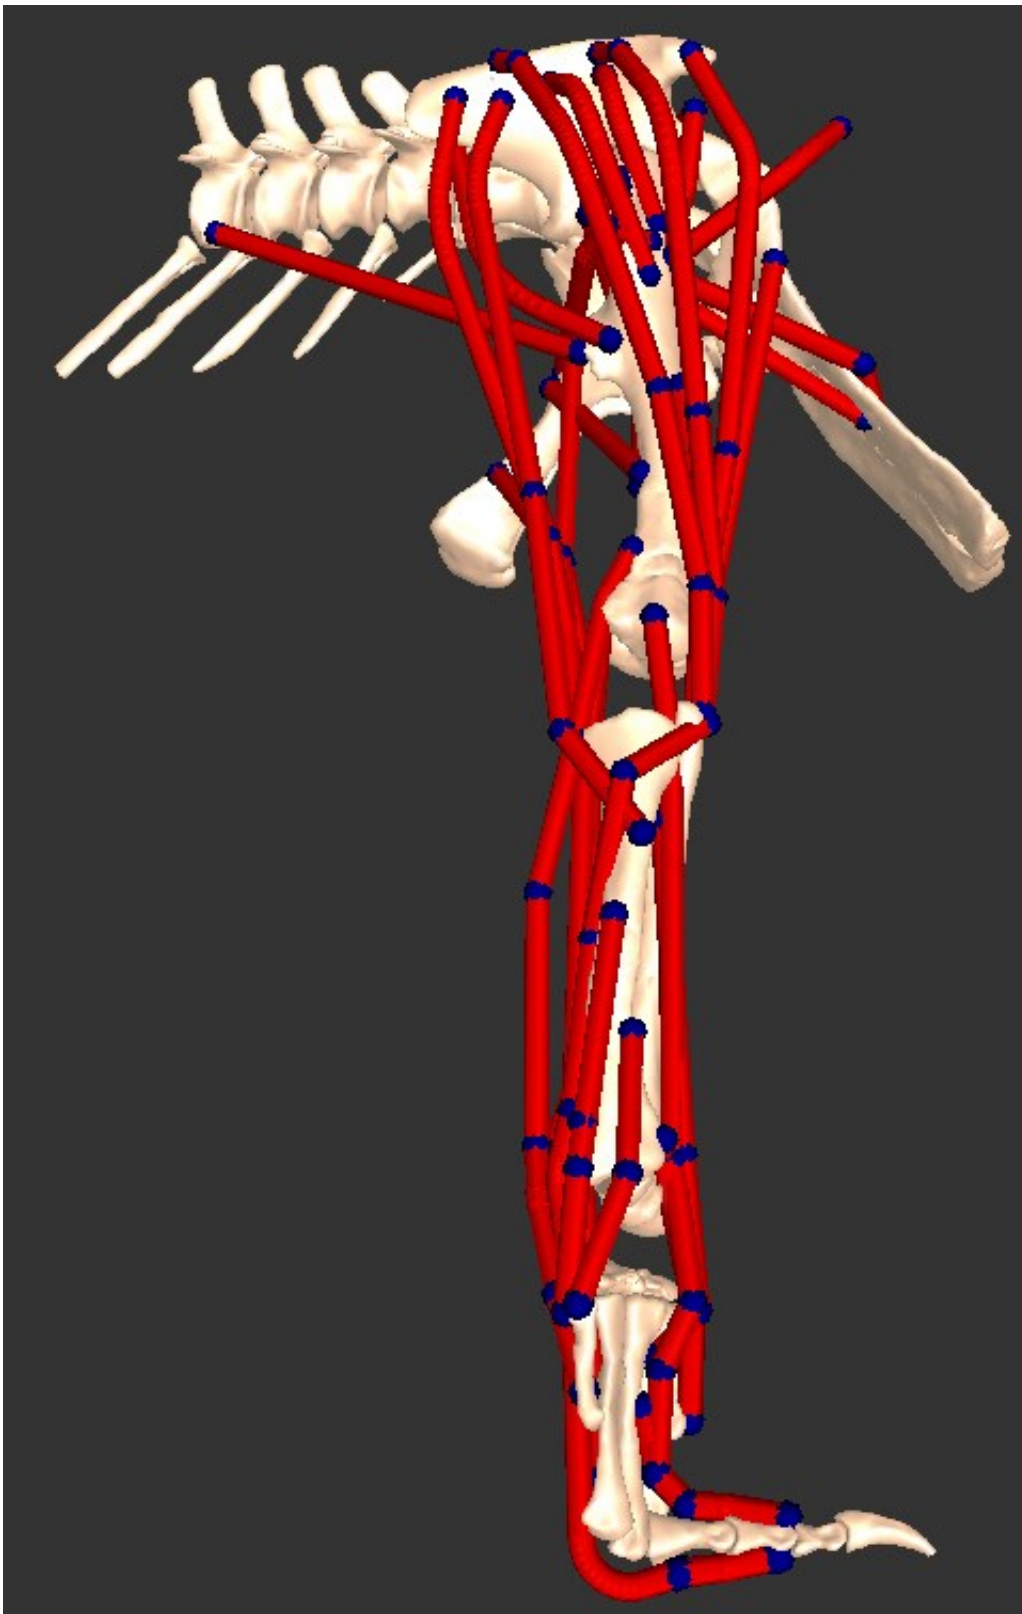

*Plateosaurus*

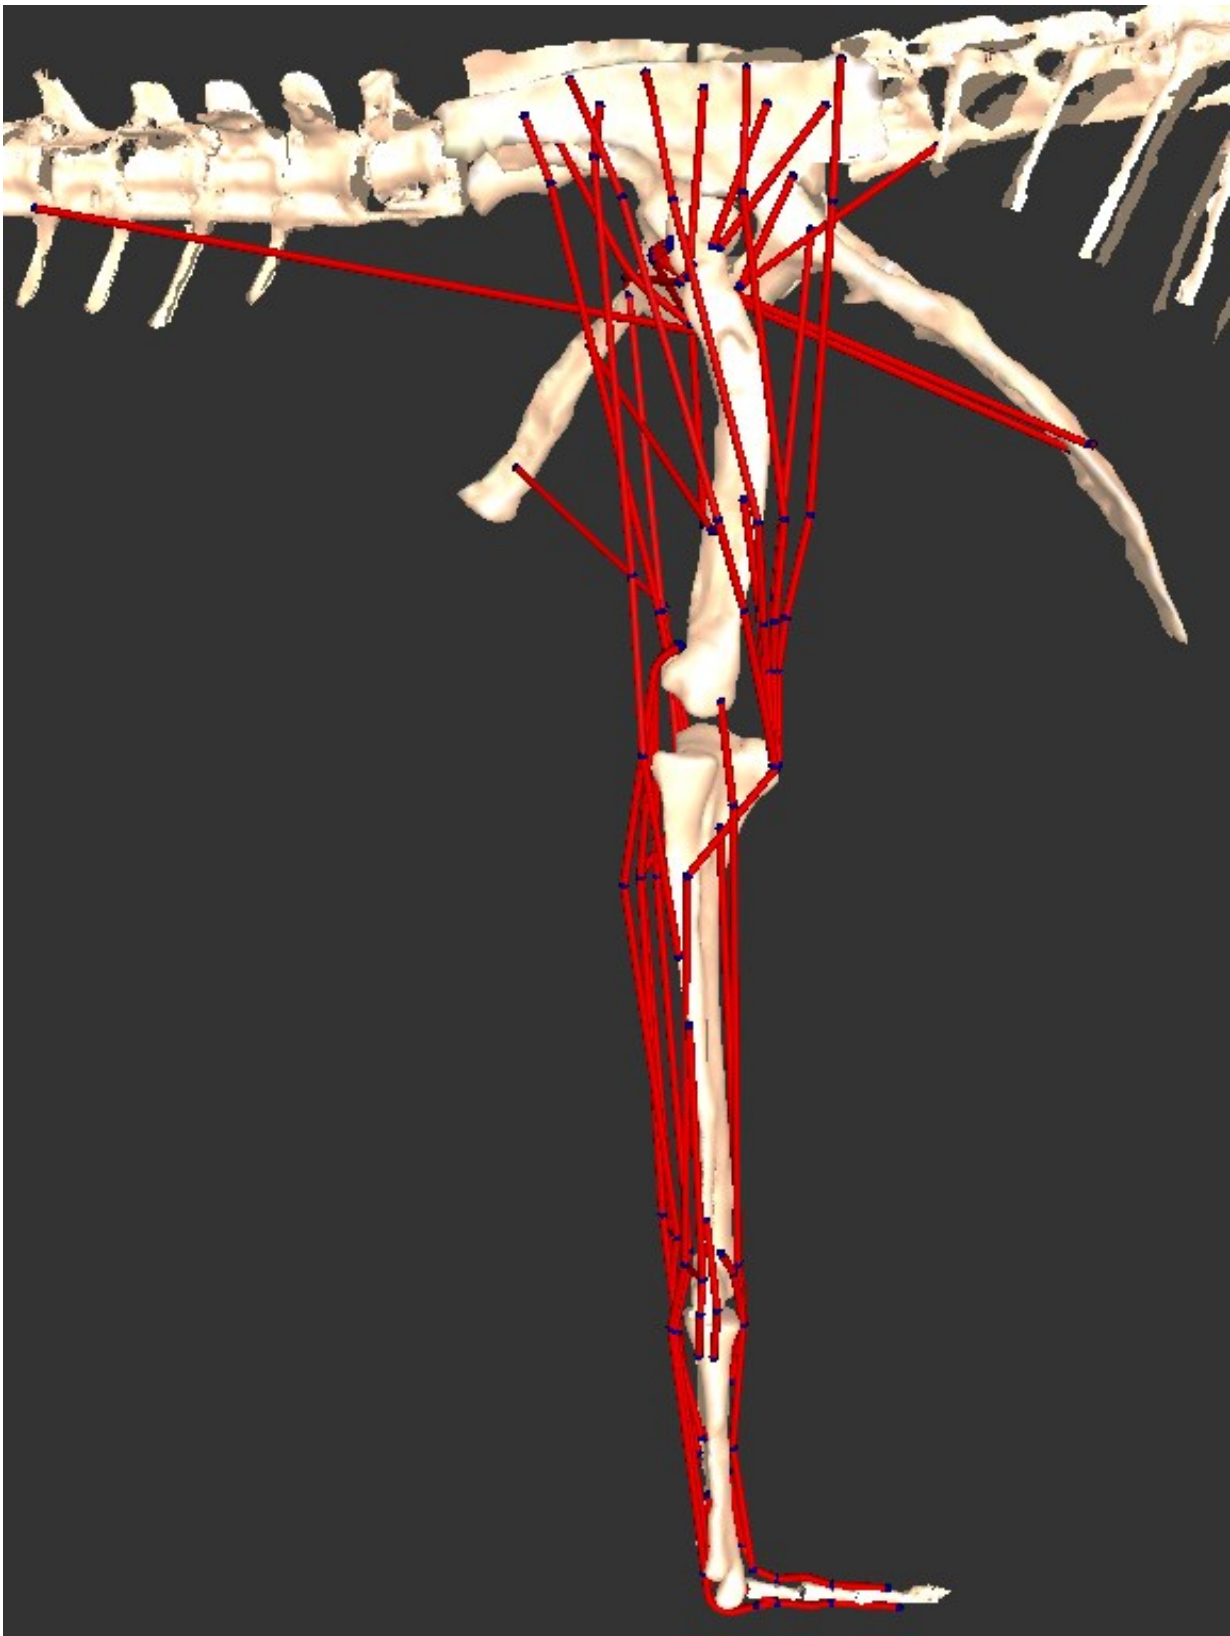

*Coelophysis*

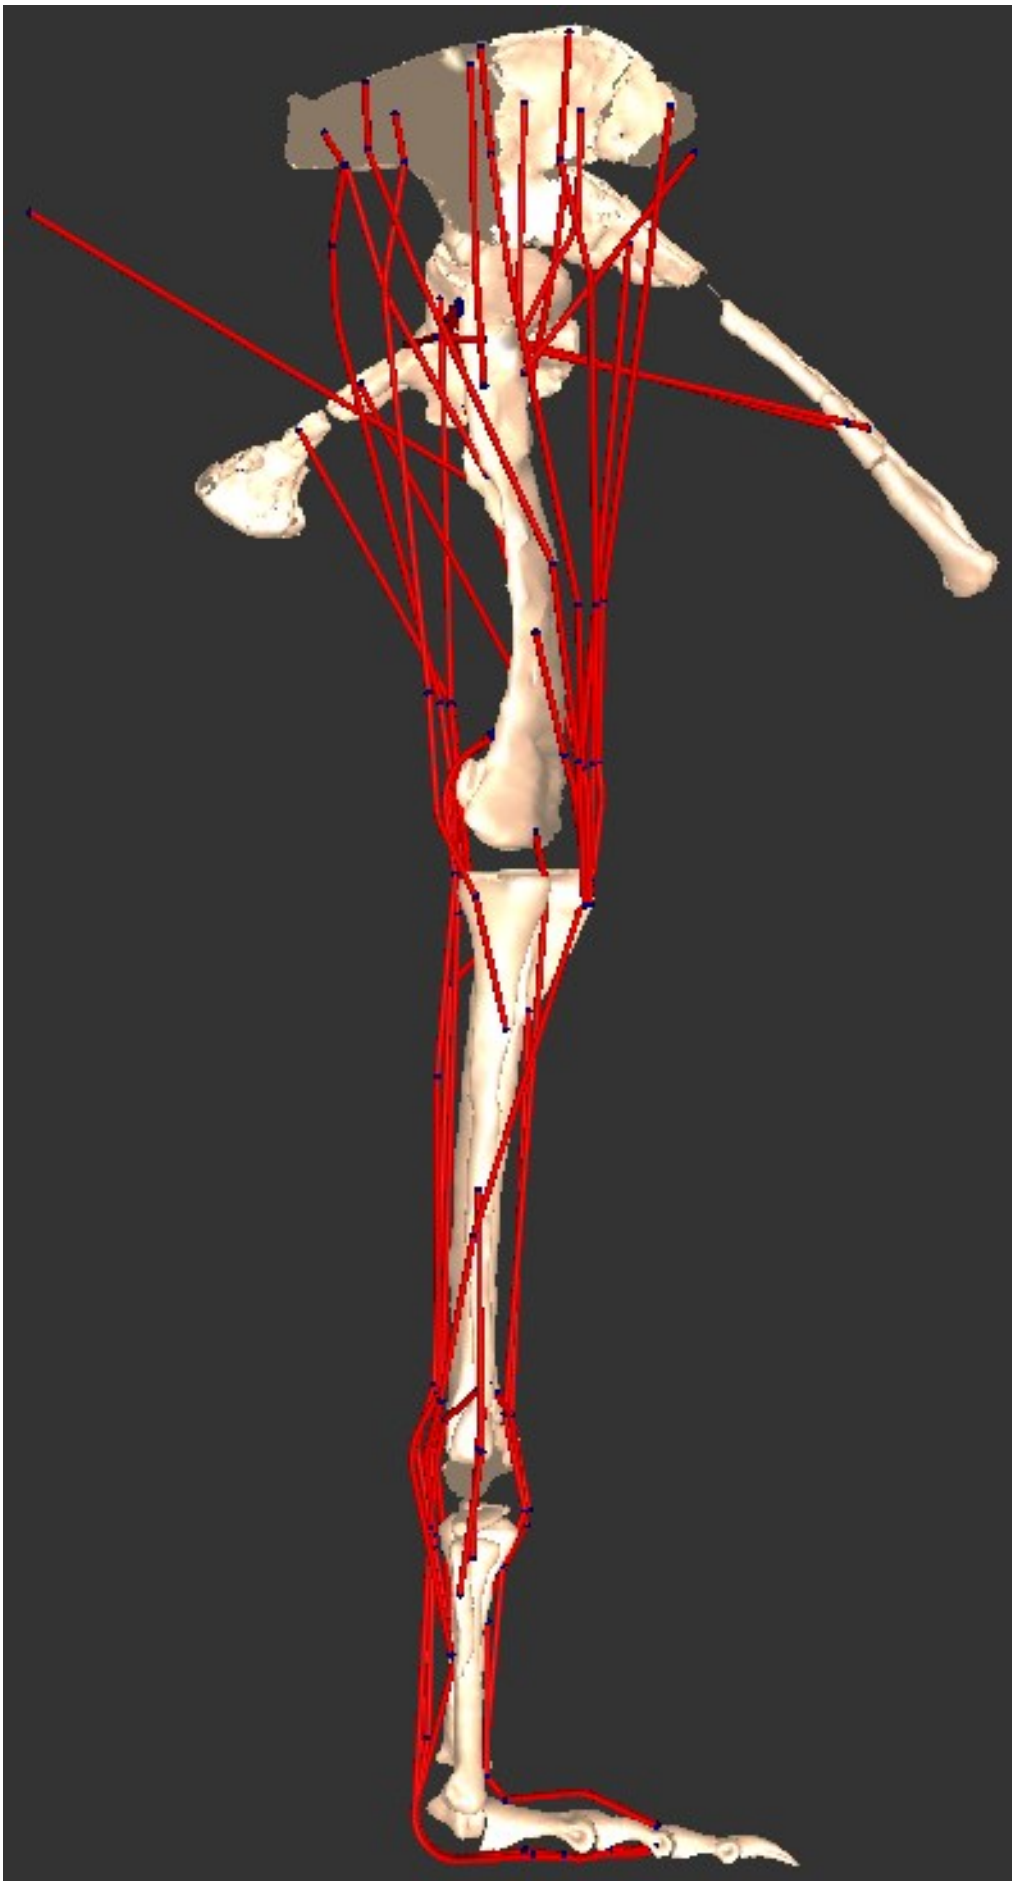

*Dilophosaurus*

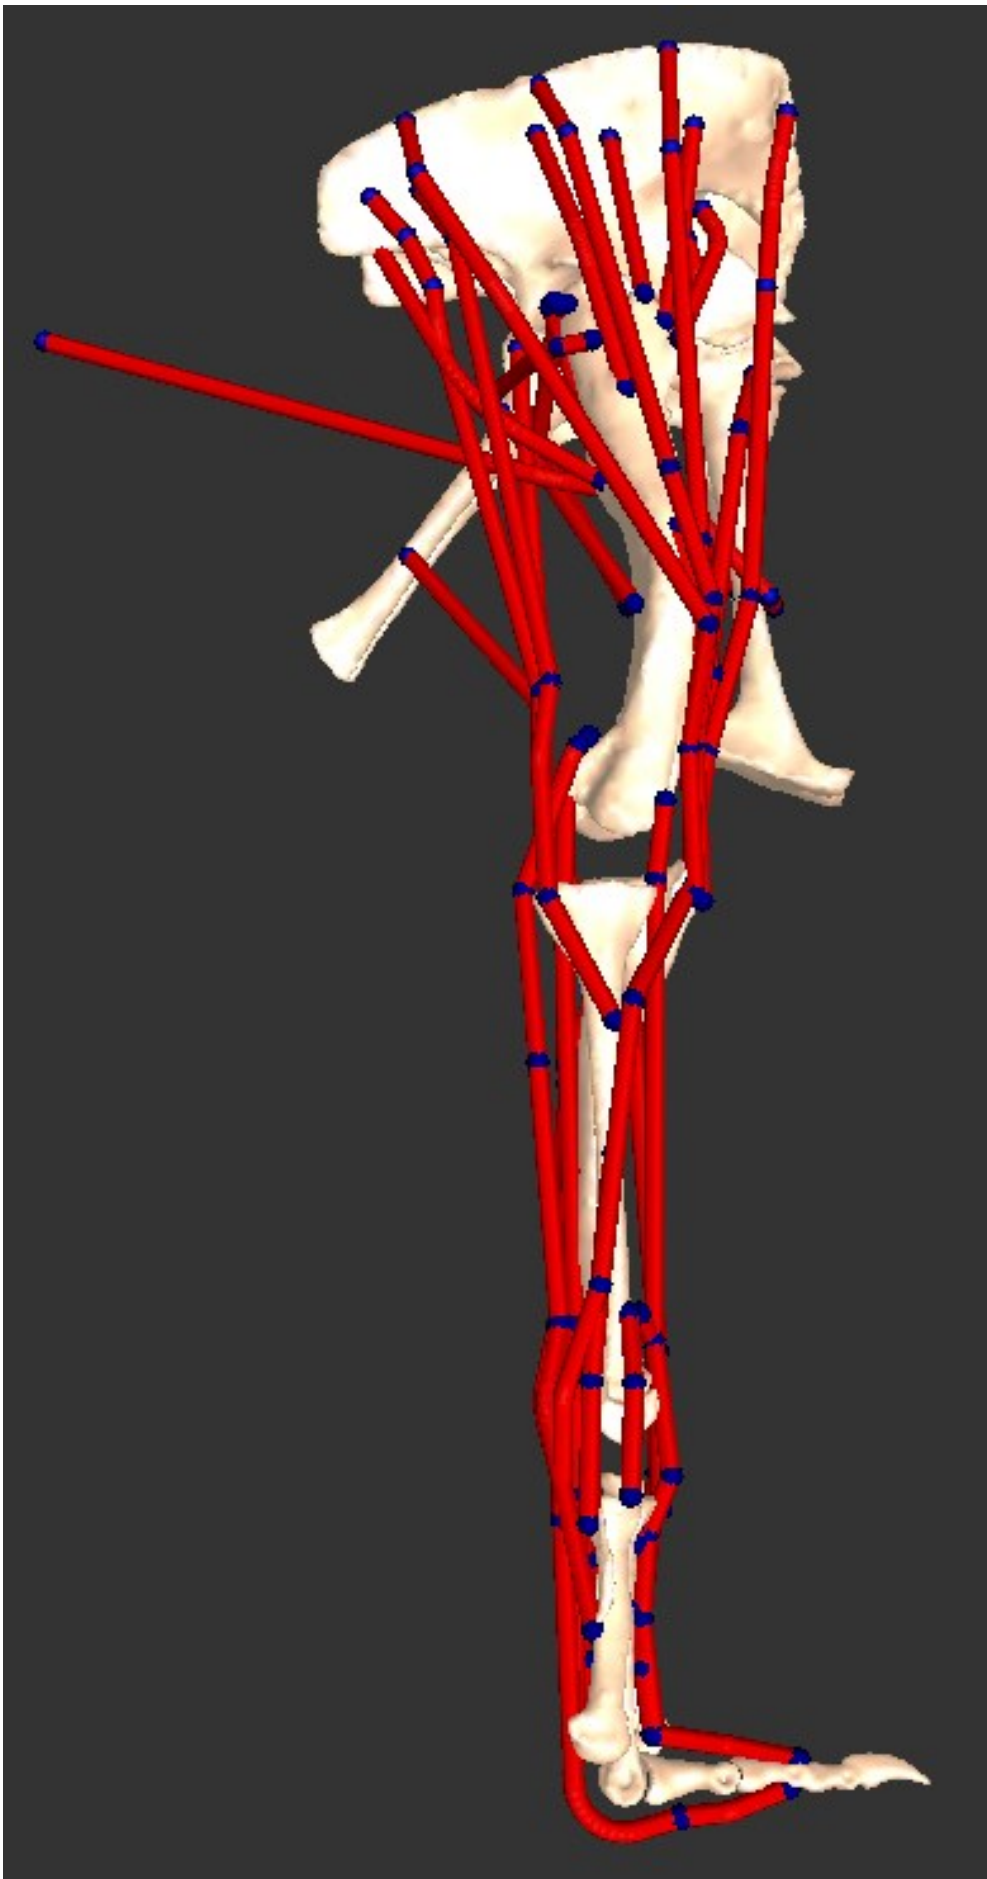

*Allosaurus*



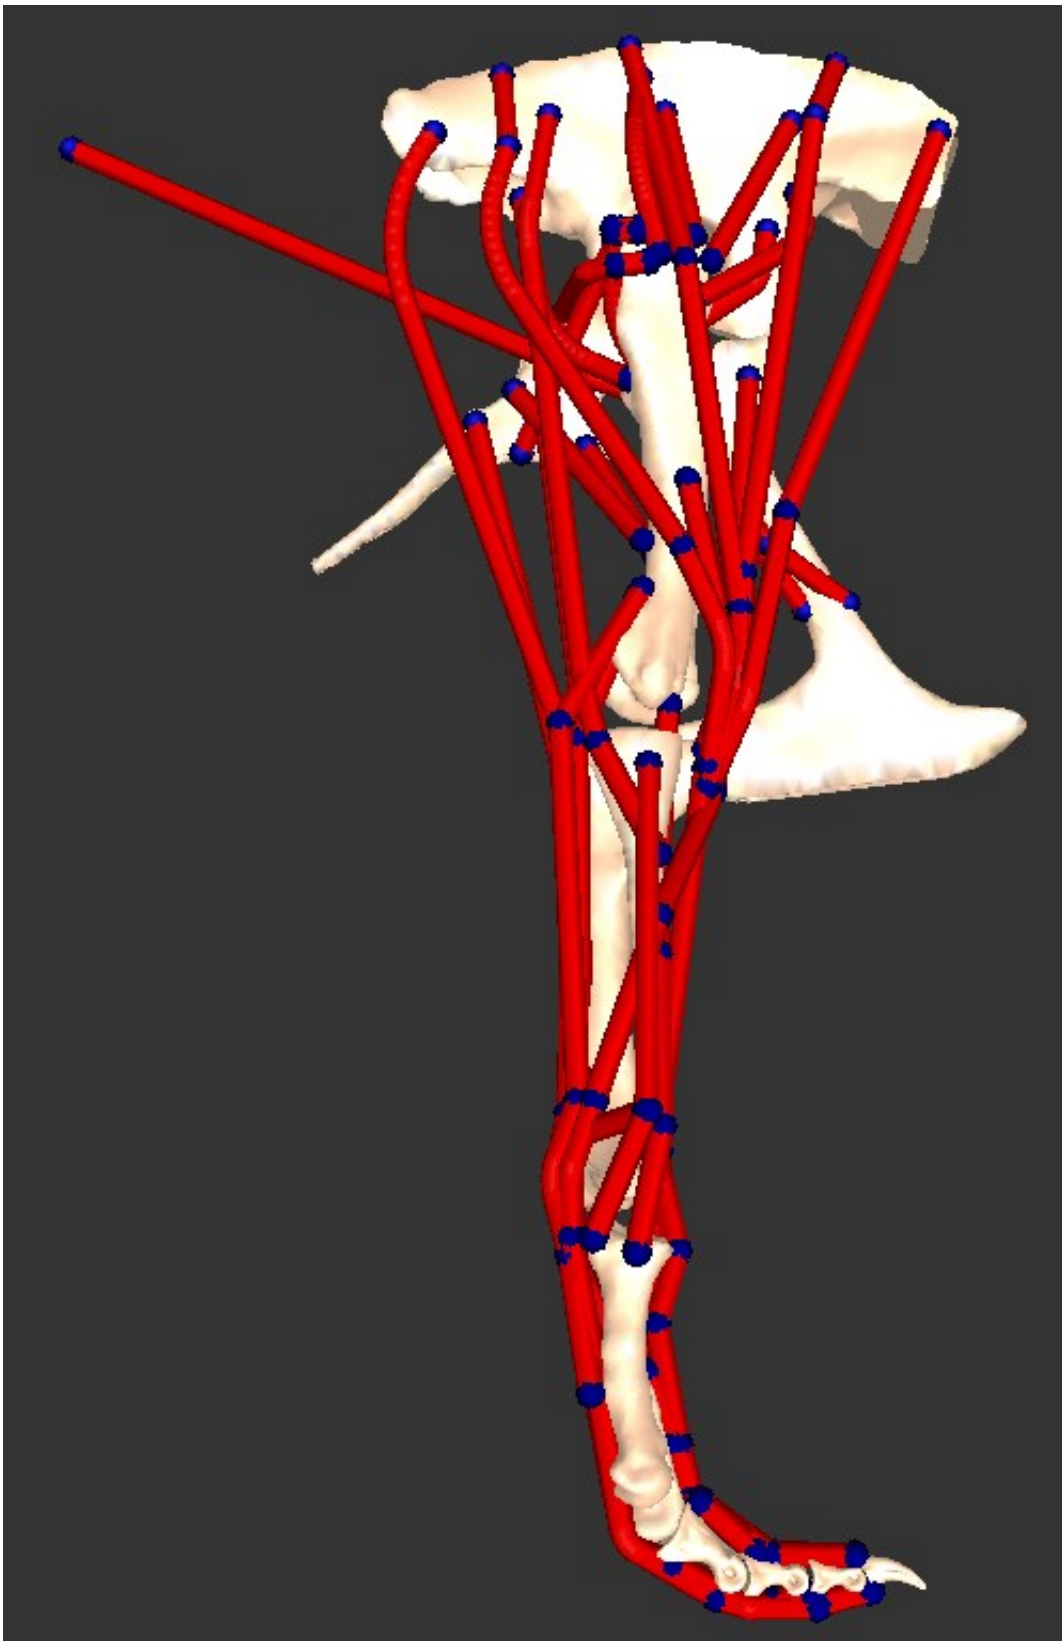

*Tyrannosaurus*

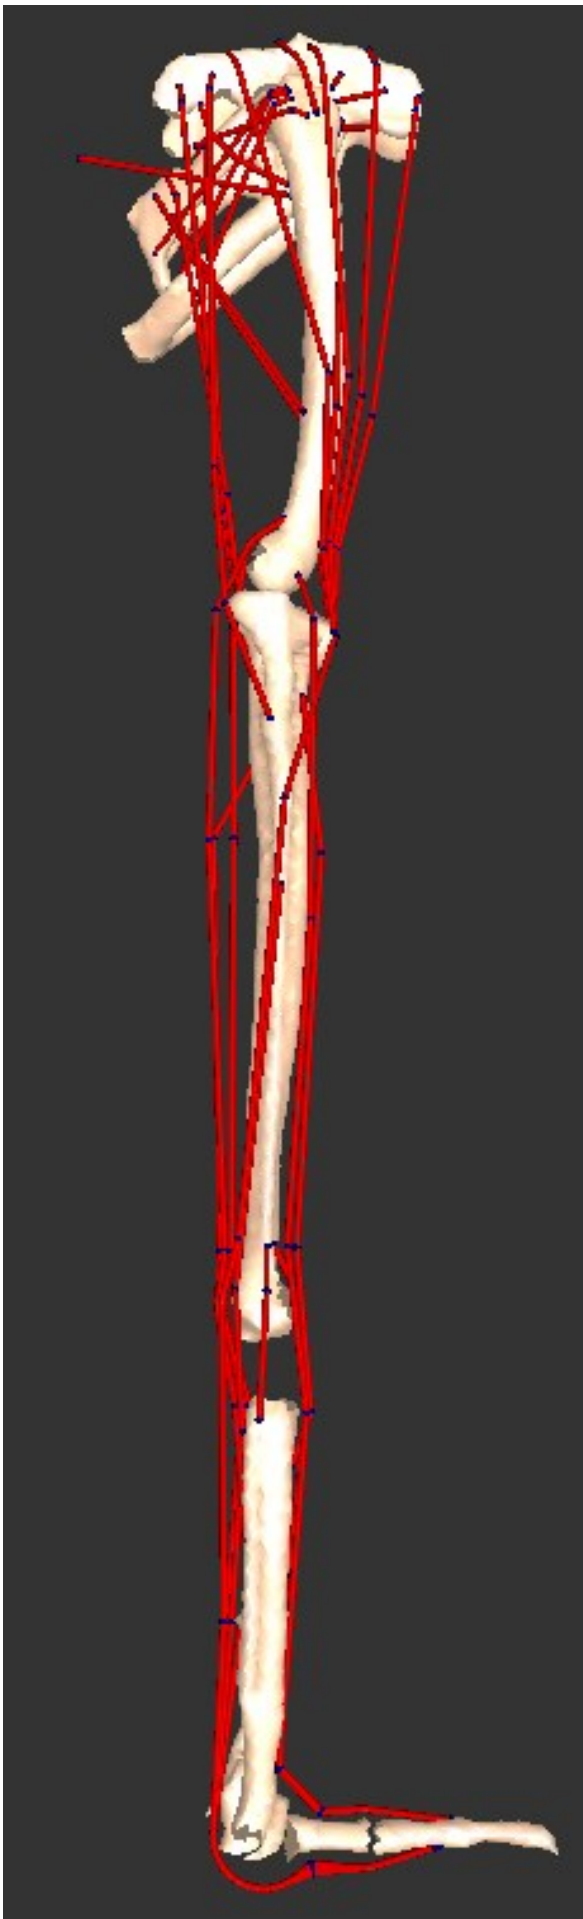

*Microraptor*

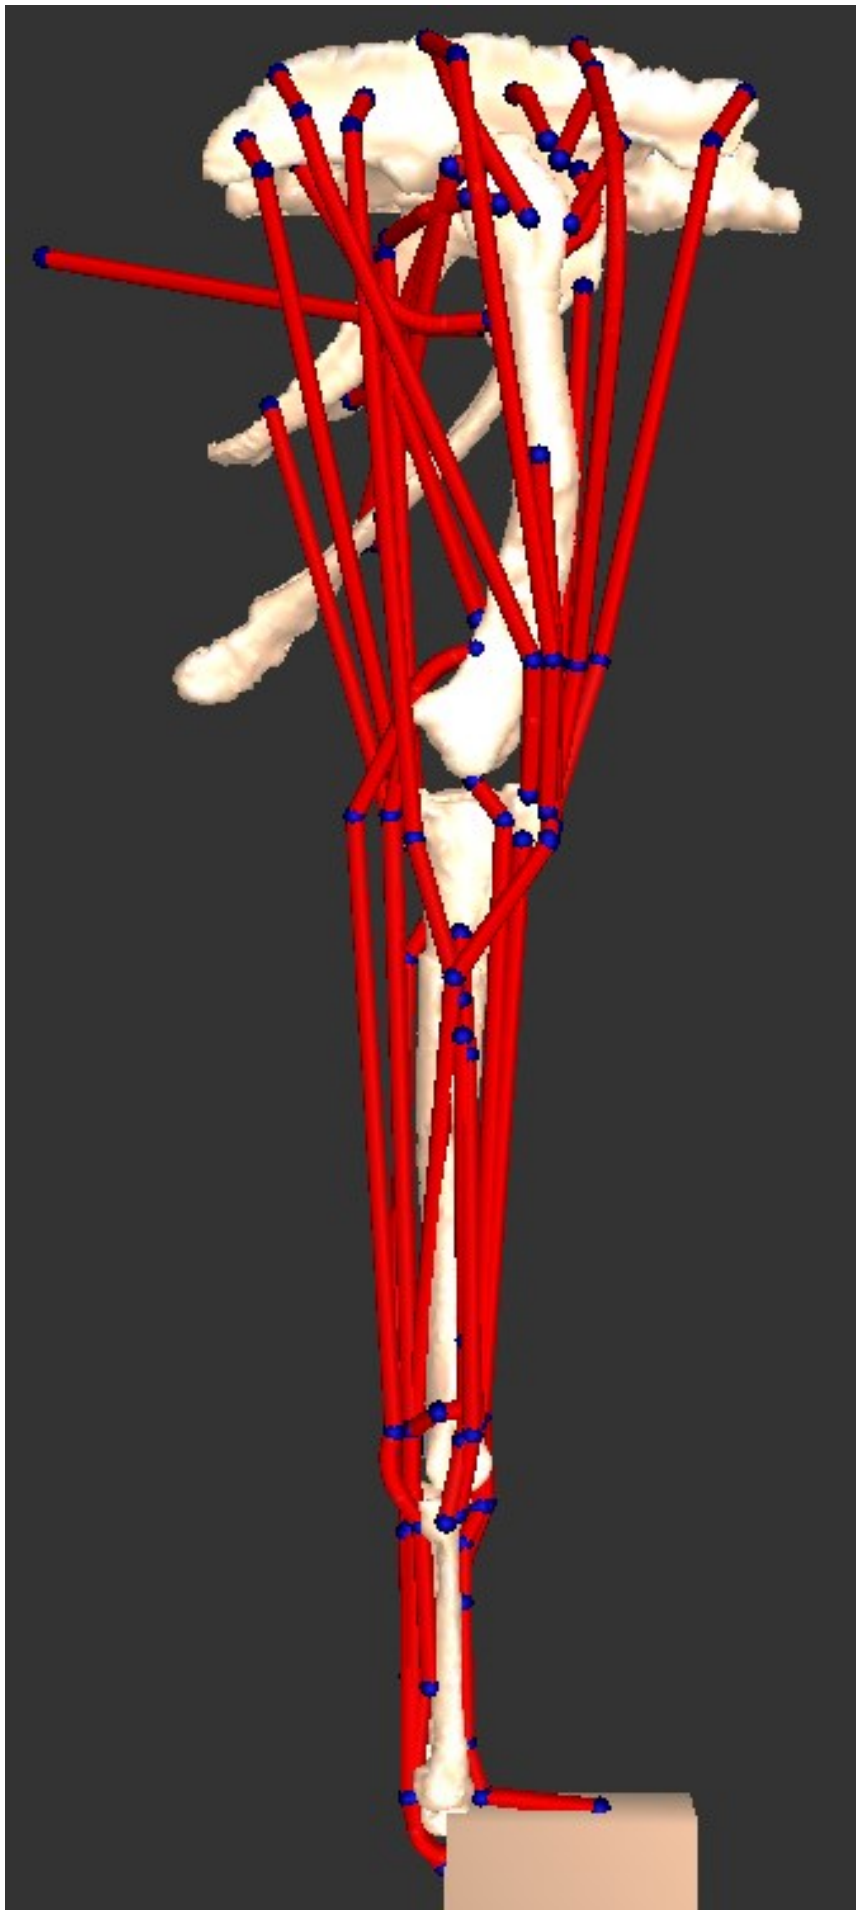

*Velociraptor*

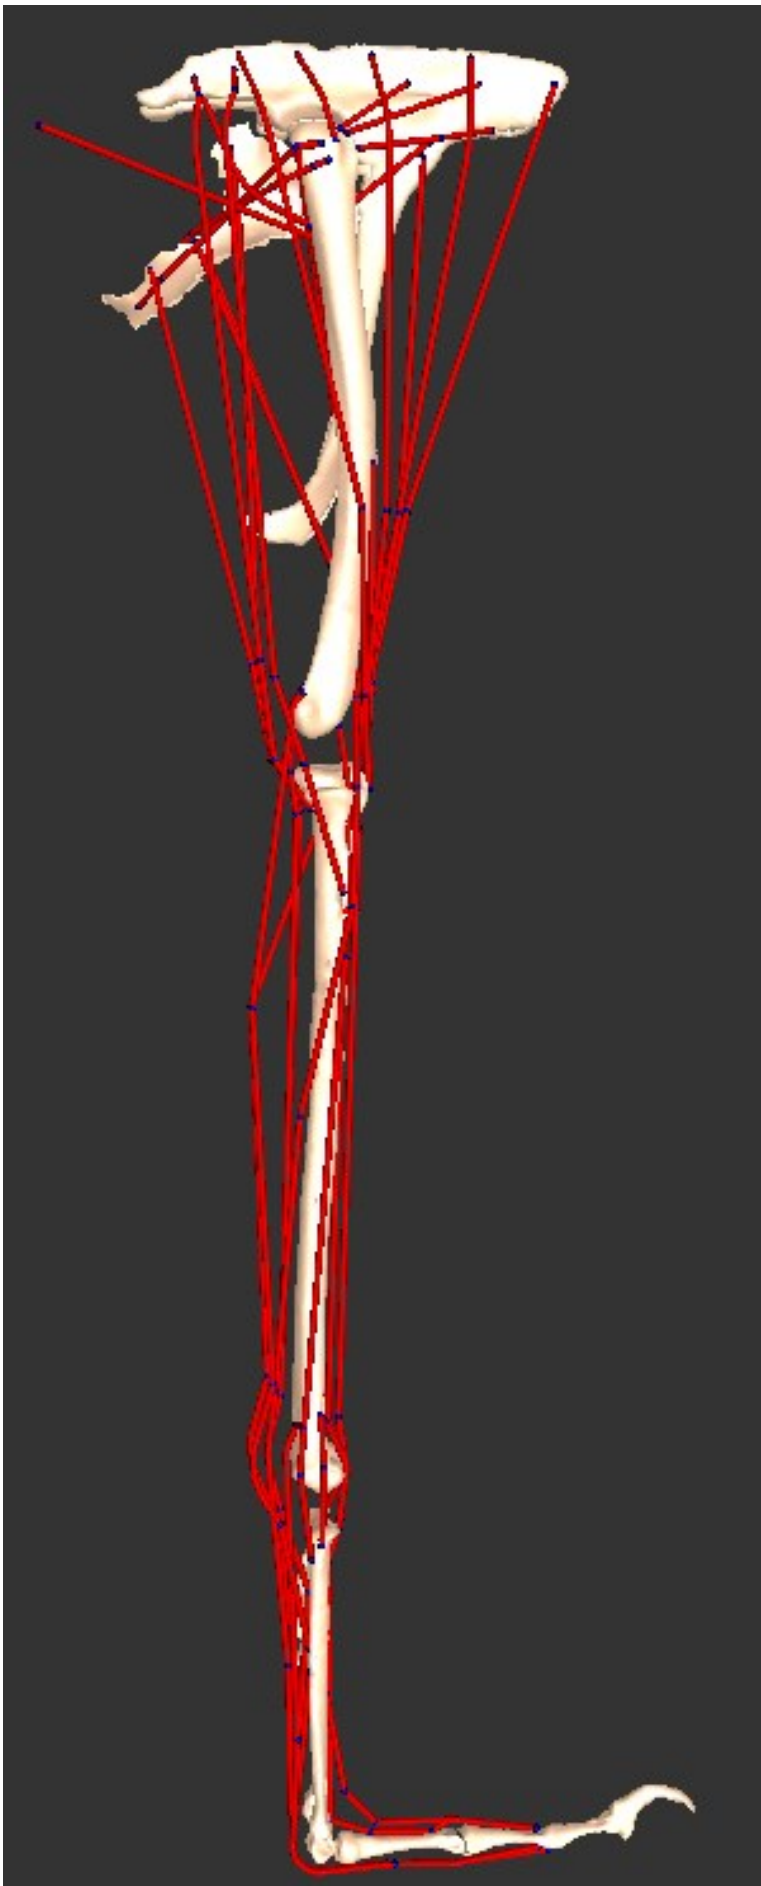

*Archaeopteryx*

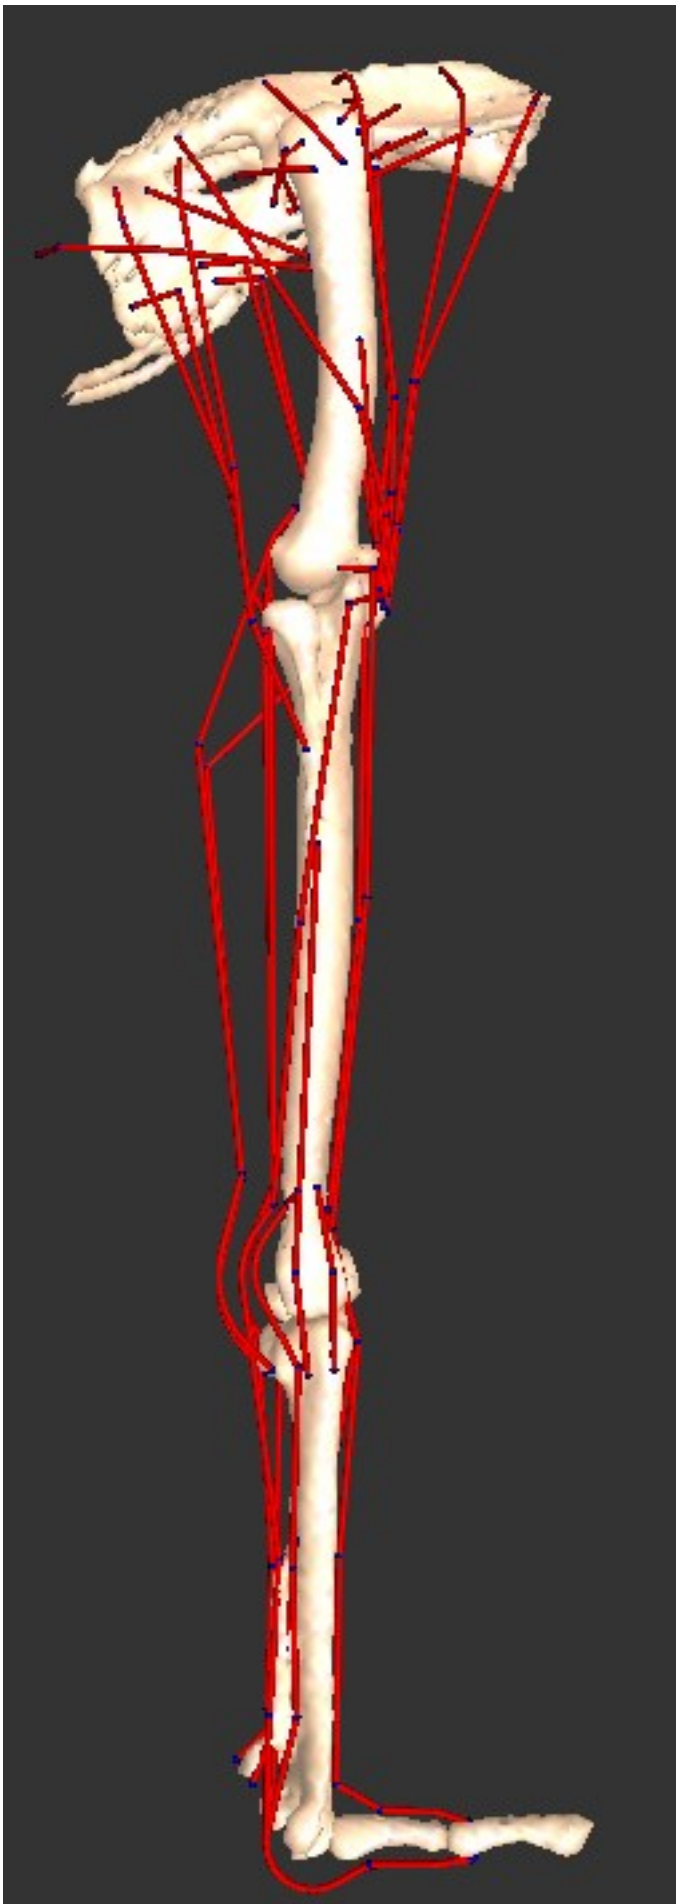

*Gallus*

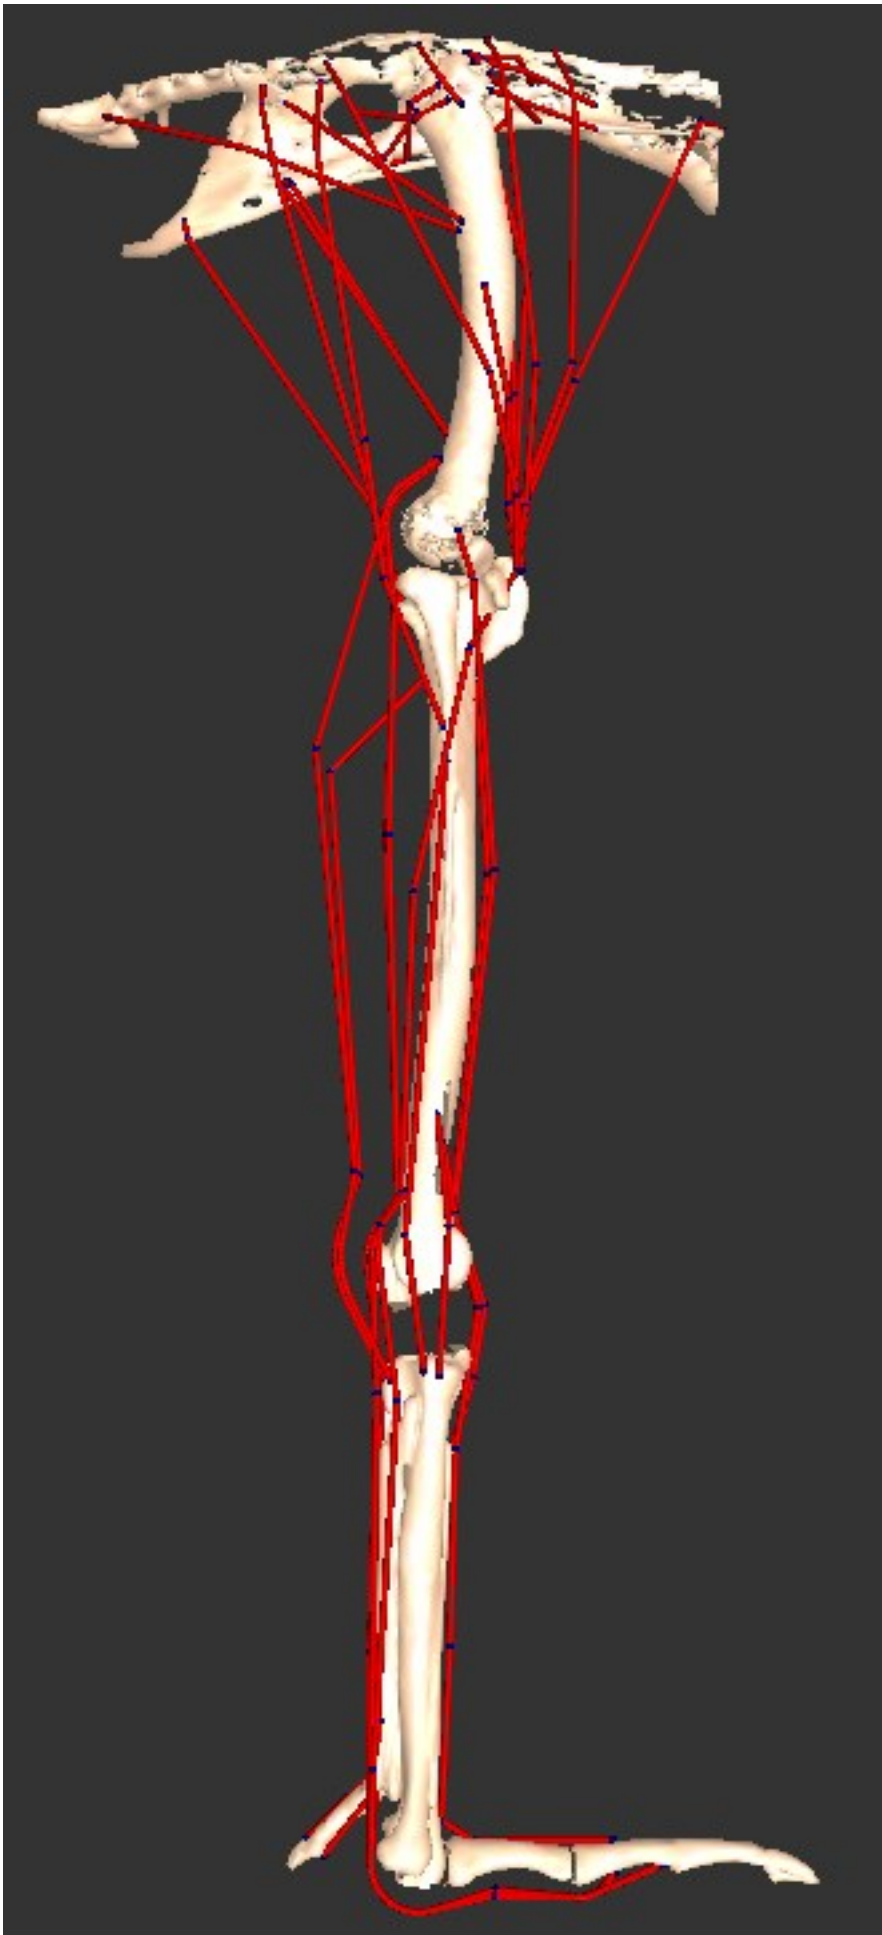

*Phasianus*

**Figure S2. Alternative results for trends in the ratios of summed (absolute value) moment arm ACE values across the phylogeny of Archosauria (cf. Figure 8).** These results are from a sensitivity analysis of branch length effects from the phylogeny (see Materials and Methods: Assumptions). (A) Changes between nodes (#1-12) of  $\geq 20\%$  magnitude are emphasized. Hypothesis 1 (H1) is rejected at Neotheropoda = node 5 (and increase at node 12), H2 is supported at node 5, and H3 is supported at node 5 (and nodes 8,11,12; with unexpected decreases and increases at nodes 2 and 10 respectively). + and – signs by muscle actions for H1-H3 indicate signs of (non-absolute value) moment arms. “LAR” = long-axis rotation. (B-D) Detailed changes of ratios of summed moment arms across the phylogeny of Archosauria, used for inferences in Fig. 8A. See also Figure 1. These results address H1 (B), H2 (C) and H3 (D).

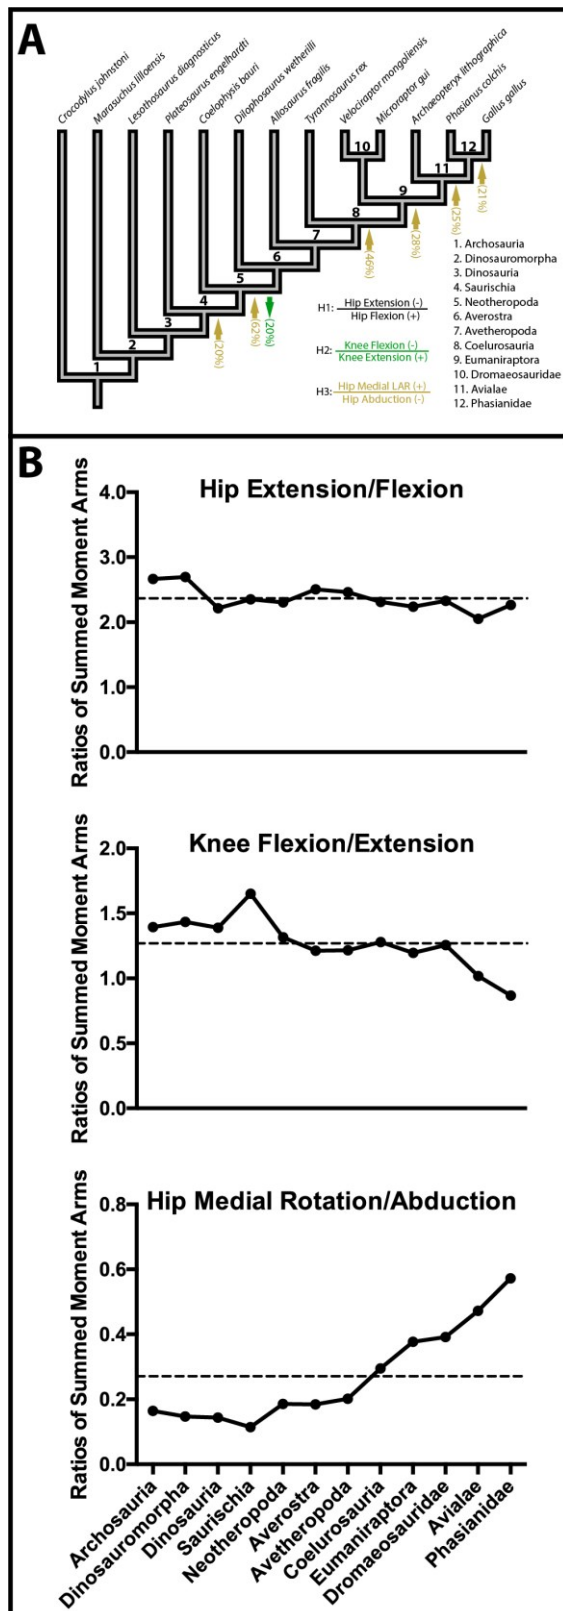

**The Evolution of Pelvic Limb Muscle Moment Arms in Bird-Line Archosaurs; Allen et al. *Science Advances***

**Text S1. Musculo-tendon unit moment arms normalized by segment length, for ancestral nodes along the phylogeny (Figure 1), as peak and minimal values for ancestral character state estimates [ACEs].**

*Hip extensors (Figure 3): peaks/minima*

| Muscle | Peak   | Minimum |
|--------|--------|---------|
| CFL    | -0.33  | -0.16   |
| CFB    | -0.23  | -0.14   |
| ILFB   | -0.24  | -0.16   |
| ADD1   | -0.22  | -0.17   |
| ADD2   | -0.31  | -0.20   |
| FTI1   | -0.45  | -0.03   |
| FTI3   | -0.36  | -0.12   |
| FTE    | -0.36  | -0.21   |
| IT3    | -0.15  | -0.05   |
| ISTR   | -0.051 | -0.011  |
| IFE    | -0.032 | 0.037   |
| ITC    | -0.023 | 0.037   |

*Hip abductors (Figure 4): peaks/minima*

| Muscle | Peak   | Minimum |
|--------|--------|---------|
| CFB    | -0.095 | -0.022  |
| ILFB   | -0.14  | -0.087  |
| FTE    | -0.10  | -0.051  |
| AMB    | -0.020 | 0.035   |
| IT1    | -0.12  | 0.061   |
| IT2    | -0.20  | -0.070  |
| IT3    | -0.19  | -0.12   |
| PIF11  | -0.070 | 0.038   |
| PIF12  | -0.035 | 0.013   |
| IFE    | -0.15  | -0.094  |
| ITC    | -0.12  | -0.031  |

*Hip flexors (Figure 3): peaks/minima*

| Muscle | Peak  | Minimum |
|--------|-------|---------|
| AMB    | 0.17  | 0.070   |
| IT1    | 0.42  | 0.12    |
| IT2    | 0.22  | 0.0016  |
| PIFE1  | 0.12  | 0.020   |
| PIFE2  | 0.12  | 0.034   |
| PIFE3  | 0.031 | 0.010   |
| PIF11  | 0.11  | 0.046   |
| PIF12  | 0.11  | 0.0041  |

*Hip lateral rotators (Figure 5): peaks/minima*

| Muscle | Peak   | Minimum  |
|--------|--------|----------|
| CFL    | -0.064 | -0.013   |
| CFB    | -0.070 | -0.026   |
| ILFB   | -0.017 | -0.00038 |
| ADD2   | -0.016 | 0.00087  |
| FTI1   | -0.018 | 0.014    |
| ISTR   | -0.15  | -0.095   |
| AMB    | -0.011 | 0.031    |
| IT1    | -0.030 | 0.031    |
| IT2    | -0.040 | 0.0058   |
| IT3    | 0.070  | -0.26    |
| PIFE1  | -0.072 | -0.00086 |
| PIFE2  | -0.066 | 0.018    |
| PIFE3  | -0.13  | -0.012   |
| IFE    | -0.032 | ~0       |

*Hip adductors (Figure 4): peaks/minima*

| Muscle | Peak  | Minimum |
|--------|-------|---------|
| ADD1   | 0.26  | -0.013  |
| ADD2   | 0.22  | -0.012  |
| FTI1   | 0.33  | 0.016   |
| FTI3   | 0.064 | -0.0044 |
| ISTR   | 0.11  | 0.017   |
| PIFE1  | 0.10  | 0.035   |
| PIFE2  | 0.10  | 0.043   |
| PIFE3  | 0.13  | 0.0069  |

*Hip medial rotators (Figure 5): peaks/minima*

| Muscle | Peak  | Minimum |
|--------|-------|---------|
| ADD1   | 0.012 | -0.012  |
| FTI3   | 0.030 | -0.0015 |
| FTE    | 0.048 | 0.0061  |
| PIF11  | 0.052 | 0.025   |
| PIF12  | 0.14  | 0.068   |
| ITC    | 0.11  | -0.0078 |



Knee extensors (Figure 6): peaks/minima

| Muscle | Peak  | Minimum |
|--------|-------|---------|
| AMB    | 0.091 | 0.049   |
| IT1    | 0.12  | 0.071   |
| IT2    | 0.11  | 0.064   |
| IT3    | 0.090 | 0.056   |
| FMTI   | 0.090 | 0.052   |
| FMTE   | 0.088 | 0.058   |
| EDL    | 0.061 | 0.0043  |
| TA*    | 0.023 | ~0      |

\*EDL in Phasianidae

Ankle plantarflexors (extensors) (Figure 7): peaks/minima

| Muscle | Peak   | Minimum |
|--------|--------|---------|
| AMB*   | -0.14  | -0.091  |
| GL     | -0.19  | -0.13   |
| GM     | -0.18  | -0.12   |
| FDL    | -0.14  | -0.090  |
| FHL    | -0.13  | -0.093  |
| FL     | -0.042 | -0.0035 |
| FL **  | -0.10  | -0.0066 |

\*distal tendon; \*\*secondary tendon

Knee flexors (Figure 6): peaks/minima

| Muscle | Peak   | Minimum |
|--------|--------|---------|
| ILFB   | -0.12  | -0.067  |
| FTI1   | -0.12  | -0.0089 |
| FTI3   | -0.12  | -0.075  |
| FTE    | -0.12  | -0.071  |
| GL     | -0.087 | -0.030  |
| FDL    | -0.085 | -0.032  |
| FHL    | -0.082 | -0.035  |

Ankle dorsiflexors (Figure 7): peaks/minima

| Muscle | Peak  | Minimum |
|--------|-------|---------|
| EDL    | 0.12  | 0.070   |
| EHL    | 0.11  | 0.012   |
| TA     | 0.12  | 0.084   |
| FB     | 0.058 | -0.015  |

Ratios of Summed Moment Arms (Figure 8): peaks/minima

| Muscle                   | Peak | Minimum |
|--------------------------|------|---------|
| Hip extensor/flexor      | 3.27 | 1.68    |
| Knee flexor/extensor     | 1.59 | 0.82    |
| Hip medial LAR/abduction | 0.33 | 0.073   |

## Supplementary Data Files

**Data file S1. Information on specimens used for musculoskeletal models.** Includes museum details, general assessment of specimen (hindlimb) completeness, scanning and reconstruction methods used, body mass (from *I2*), and hindlimb dimensions used for moment arm normalization.

**Data file S2. Study taxa branch lengths and node divergence times used in this study (also see Figure 1).**

**Data file S3. Detailed results from phylogenetic analysis of hip extensor and flexor mean MTU moment arm data.** Worksheets show data (values per node from ACE analysis, per muscle) for extensors, flexors and then the ratio of their summed values per node, with changes of  $\geq 10\%$  and  $\geq 20\%$  (as per Figure 8) in red font or highlighted. Highlighted “change” cells summarize total change from Archosauria to Phasianidae nodes.

**Data file S4. Detailed results from phylogenetic analysis of knee flexor and extensor mean MTU moment arm data.** See caption of Data file S3 for further details.

**Data file S5. Detailed results from phylogenetic analysis of hip long-axis rotator (LAR; medial and lateral) and abduction/adduction (ABAD) mean MTU moment arm data.** See caption of Data file S3 for further details.

**Data file S6. Detailed results from phylogenetic analysis of ankle (dorsi)flexor and extensor (plantarflexor) mean MTU moment arm data.** See caption for Data file S3 of further details.

**Data file S7. Scripts and associated files used for analyses in OCTAVE and R (.zip archive).** README text file explains organization.
